# Supplementary material for: High Prevalence of Hepatitis Delta Virus among Persons Who Inject Drugs, Vietnam
Source: PubMed Central journal article supplement (PMC4344271; doi:10.3201/eid2103.141147), 2015-03
Supplement: 14-1147-Techapp-s1.pdf [file 14-1147-Techapp-s1.pdf]

# High Prevalence of Hepatitis Delta Virus among Persons Who Inject Drugs, Vietnam

## Technical Appendix

### Tabular summary of frequency of cases of hepatitis delta virus among persons who inject drugs and statistical analysis of data in study regions of Vietnam

Technical Appendix Table 1. Hepatitis B surface antigen seropositivity in persons who inject drugs from 5 study regions in Vietnam\*

| Group/HBV Serostatus | Northern no. (%) |           | Central no. (%) | Southern no. (%) |         | Total no. (%) |
|----------------------|------------------|-----------|-----------------|------------------|---------|---------------|
|                      | Ha Noi           | Hai Phong | Da Nang         | Khanh Hoa        | Can Tho |               |
| PWIDs                | 400              | 400       | 400             | 400              | 399     | 1,999         |
| HBsAg (+)            | 43 (10.8)        | 51 (12.8) | 76 (19)         | 74 (18.5)        | 56 (14) | 300 (15)      |

\*HBV, hepatitis B virus; PWIDs, persons who inject drugs; HBsAg, hepatitis B surface antigen.

Technical Appendix Table 2. Hepatitis delta virus IgG and IgM seropositivity in hepatitis B surface antigen-positive persons who inject drugs in 5 study regions in Vietnam\*

| Characteristics   | Northern, no. (%) |               | Central, no. (%) | Southern, no. (%) |             | Total, no. (%) |
|-------------------|-------------------|---------------|------------------|-------------------|-------------|----------------|
|                   | Ha Noi, 43        | Hai Phong, 51 | Da Nang, 76      | Khanh Hoa, 74     | Can Tho, 56 |                |
| Serologic Markers |                   |               |                  |                   |             | 294*           |
| HDV IgG (+)       | 13 (30.2)         | 15 (29.4)     | 4 (5.3)          | 6 (8.1)           | 7 (12.5)    | 45 (15.3)      |
| HDV IgM (+)       | 5 (11.6)          | 8 (15.6)      | 2 (2.6)          | 5 (6.7)           | 0 (0)       | 20 (6.8)       |

\*Of the 300 hepatitis B surface antigen-positive samples (Table 1), 294 were available for analysis; the remaining 6 had insufficient sample volumes. HDV, hepatitis delta virus.



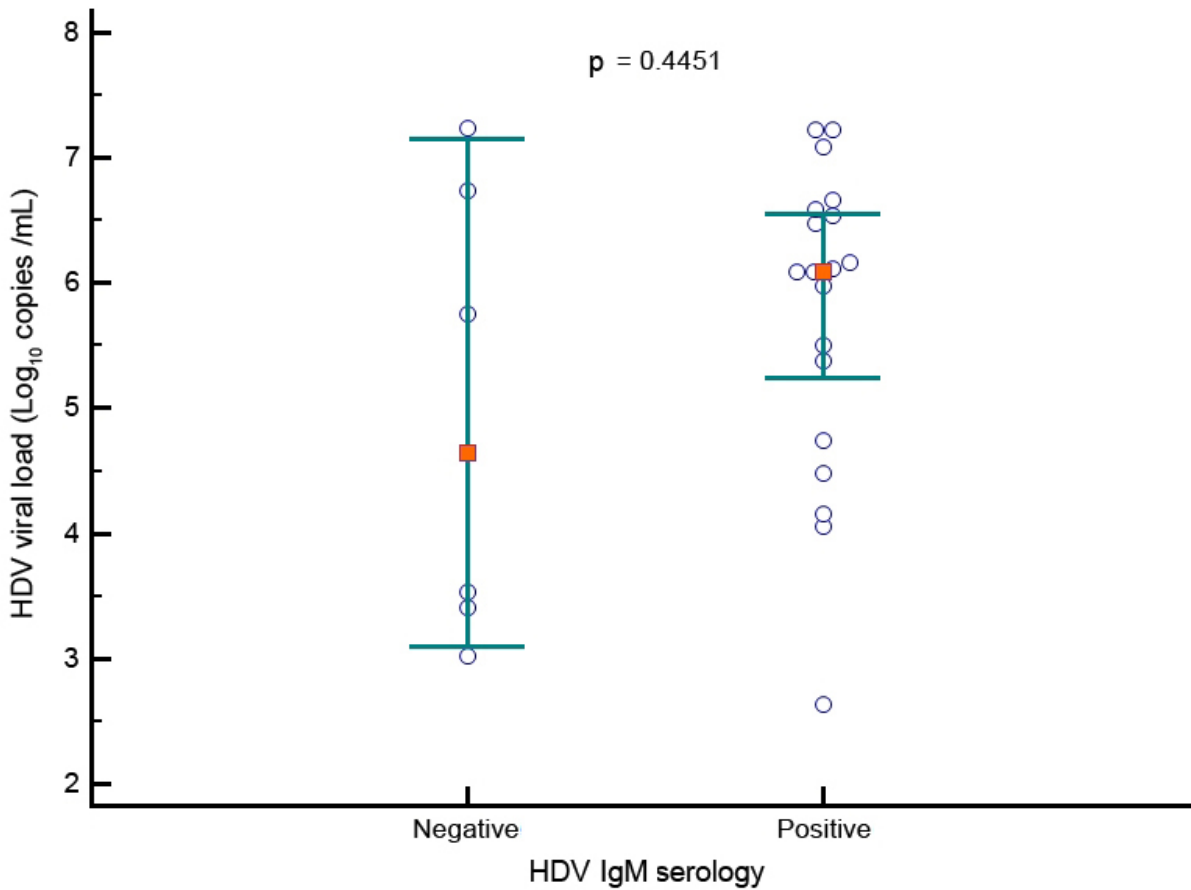

Technical Appendix Figure 2. HDV RNA log<sub>10</sub> copies/mL in IgM-negative/HDV RNA positive (n=6) and IgM-positive/HDV RNA positive (n=19) samples. The orange square indicates the median and the error bars indicate 95% CI.
